# Supplementary material
Source: HighWire-hosted journal article supplement (https://bmjopen.bmj.com/content/10/3/e035134)
Supplement: inline-supplementary-material-2 [file inline-supplementary-material-2.pdf]

SPRINGER NATURE

Author Services

Editing Certificate

This document certifies that the manuscript

Development of screening tools to predict the risk of recurrence and related complications following anal fistula surgery: protocol for a prospective cohort study

prepared by the authors

Zubing Mei, Yue Li, Zhijun Zhang, Haikun Zhou, Suzhi Liu, Ye Han, Peixin Du, Xiufang Qin, Zhuo Shao, Maojun Ge, Qingming Wang, Wei Yang

was edited for proper English language, grammar, punctuation, spelling, and overall style by one or more of the highly qualified native English speaking editors at SNAS.

This certificate was issued on **February 4, 2020** and may be verified on the [SNAS website](#) using the verification code **B8CF-ECA7-4F33-353A-DEE0**.

Neither the research content nor the authors' intentions were altered in any way during the editing process. Documents receiving this certification should be English-ready for publication; however, the author has the ability to accept or reject our suggestions and changes. To verify the final SNAS edited version, please visit our verification page at [secure.authorservices.springernature.com/certificate/verify](https://secure.authorservices.springernature.com/certificate/verify).

If you have any questions or concerns about this edited document, please contact SNAS at [support@as.springernature.com](mailto:support@as.springernature.com).

SNAS provides a range of editing, translation, and manuscript services for researchers and publishers around the world. For more information about our company, services, and partner discounts, please visit [authorservices.springernature.com](https://authorservices.springernature.com).
